# Supplementary material for: Diuretic Effect and Metabolomics Analysis of Crude and Salt-Processed Plantaginis Semen
Source: PubMed Central journal article supplement (PMC7774519; doi:10.3389/fphar.2020.563157), 2020-11-24
Supplement: Image1.pdf [file Image1.pdf]

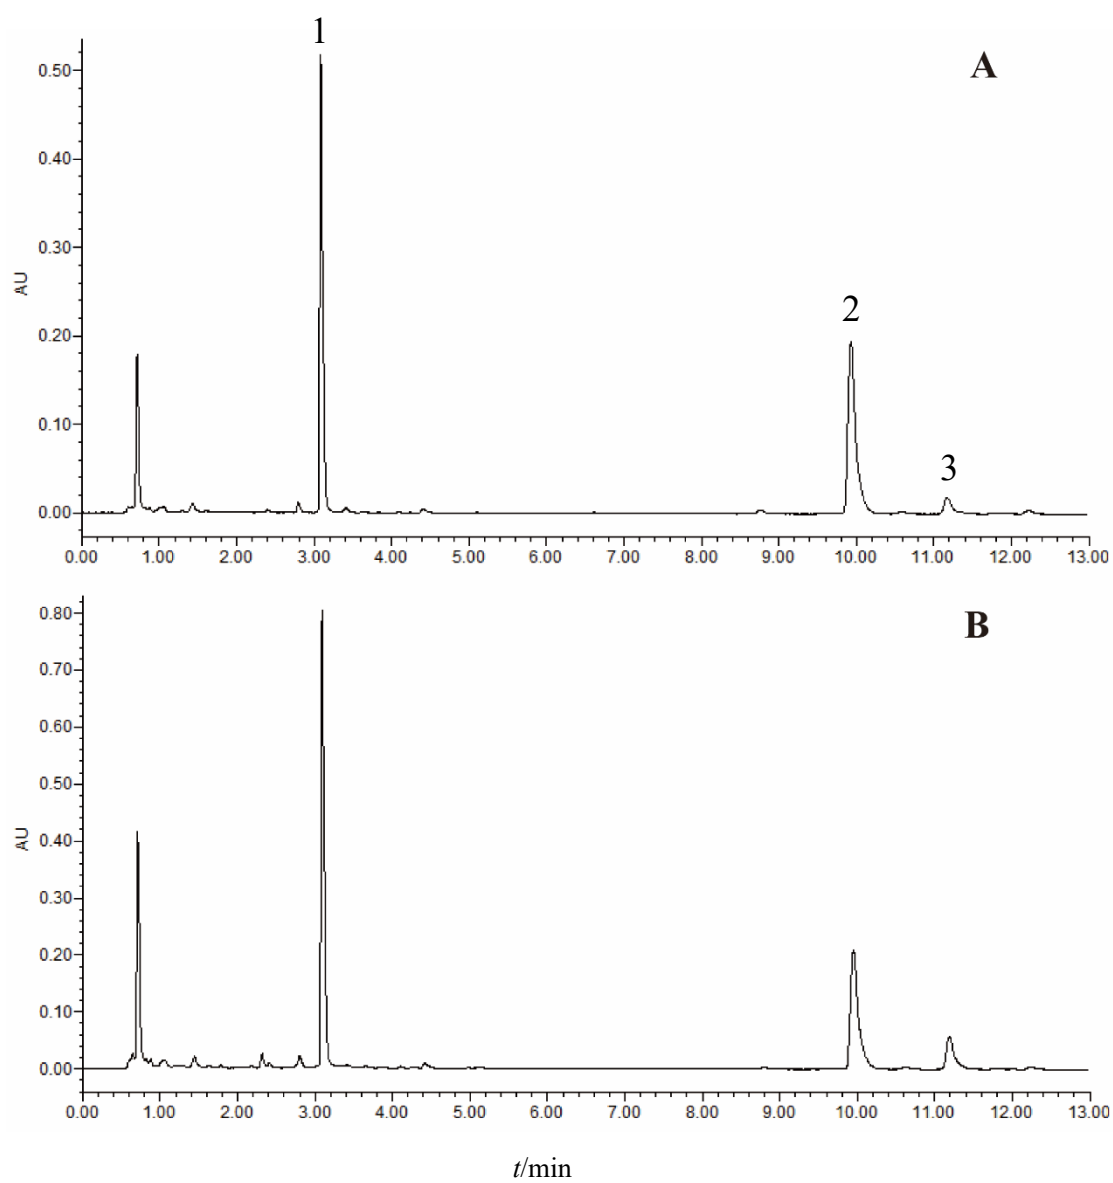

Figure S1| UPLC chromatograms of PS decoctions at 254 nm wavelength: A-CPS, B-SPS  
1—geniposidic acid, 2—verbascoside, 3—isoverbascoside
